1 Differences in Therapeutic Efficacy in Pancreatic Cancer Between Interstitial and Superficial Light  
2 Delivery Strategies in Targeted Photo Therapy  
3  
4  
5  
6

7 Nzola De Magalhães<sup>1\*</sup>, M.S., Ph.D., HTL(ASCP)<sup>CM</sup>  
8  
9  
10  
11

12 <sup>1</sup>Department of Surgery, Moores Cancer Center, University of California San Diego, San Diego,  
13 California, United States of America  
14  
15

16 \*Corresponding Author

17 E-mail: [nmmagalh@uci.edu](mailto:nmmagalh@uci.edu) (NDM)  
18  
19  
20  
21

22 **Keywords:** Photo Therapy; Pancreatic Cancer; Cetuximab; PDAC; Photoimmunotherapy; 700DX;  
23 Near-Infrared; Photosensitizer;  
24  
25

26

## 27 **Abstract**

28 The purpose of this study was to determine if therapeutic efficacy of a Cetuximab based near-infrared  
29 (NIR) targeted photo therapy (TPT) was dependent on light delivery strategies. We examined the  
30 cytotoxic effects of TPT in a pancreatic cancer mouse model, when administered to tumors interstitially  
31 and superficially.

32

33 A subcutaneous mouse model of pancreatic cancer using BXPC-3 - GFP cells was established in male  
34 athymic (nu/nu) mice. The mice received intravenous (IV) injection of Cetuximab-IR700DX, 24 hours  
35 prior to near-infrared light irradiation. Interstitial illumination was administered at a 400mW/cm fixed  
36 power output, at a light dose of 100 J/cm to half the mice and at 300 J/cm to the remaining mice.  
37 Superficial illumination was administered at a 150mw/cm<sup>2</sup> fixed power density at a dose of 50 J/cm<sup>2</sup> to  
38 half the mice, and at 250 J/cm<sup>2</sup> to the other half. Cellular damage and decrease in cell viability was  
39 determined by the decrease in GFP fluorescence intensity levels in whole animal images and in relative  
40 intensity measurements.

41

42 Interstitially administered TPT resulted in greater long-term permanent damage (72 hours post  
43 treatment) to tumor cells (0% recovery at low dose, and 11% recovery at high dose) compared to  
44 superficially administered TPT (1% recovery at low dose, and 44% recovery at high dose). While these  
45 results demonstrated that near-infrared targeted photo therapy efficacy was dependent on the type of  
46 light delivery strategy, overall, both superficial and interstitial Cet-IR700DX based near-infrared  
47 targeted photo therapy can effect significant long-term damage (less signal recovery) to pancreatic  
48 cancer cells *in vivo* at lower doses regimens, compared to higher dose regimens (higher signal  
49 recovery).

50

## 51 **Introduction**

52 Pancreatic ductal adenocarcinoma (PDAC) is a highly lethal disease due to very late prognosis and its  
53 aggressive and metastatic nature [1-3]. With a five-year overall survival rate of only 6% and a 1.3 %  
54 increase in new cases each year [4], more effective therapeutic strategies are necessary to reduce the  
55 mortality rate attributed to this disease [5-10].

56

57 Targeted photo therapy (TPT), first introduced in 1983 [11], utilizes a photosensitized dye  
58 (photosensitizer, PS) conjugated to a tumor biomarker, that when activated by a light source (e.g. laser)  
59 of a specific energy and wavelength, causes selective ablation of local tumors, leaving surrounding  
60 normal tissue intact [12-14]. In addition to enhanced tumor specificity, TPT offers additional  
61 advantages: the fluorescence properties of the PS may be used for the detection of cancers and to  
62 guide therapy (theranostics); depending on the PS, photo therapy can induce cell death by thermal  
63 damage or oxidative damage, bypass drug resistance mechanisms, and larger tumors and deeper  
64 lesions can be targeted with longer wavelength PS for deeper tissue penetration [15-16].

65

66 The efficacy of TPT to induce acute and long-term cytotoxic effects *in vivo* in different cancers via  
67 superficial illumination has been demonstrated [17-23]. The aim of this study was to determine whether  
68 the method of light delivery affected the therapeutic response of cancer cells treated with TPT. In this  
69 study, we investigate the differences in therapeutic efficacy between interstitial and superficial  
70 illumination of TPT using an antibody-dye conjugate derived from Cetuximab and near-infrared dye  
71 IR700DX (Cet-IR700DX), in a mouse model of human pancreatic cancer.

72

73 The green fluorescent protein (GFP) was utilized as an imaging tool [24-30] to assess qualitatively,  
74 quantitatively, and immunohistochemically, the therapeutic efficacy of TPT *in vivo*.

75  
76 The outcome of this study demonstrated that the light delivery strategy also affects the efficiency of  
77 light-based therapy. Therefore, light illumination should be optimized along with pertinent TPT  
78 components such as drug dosage and drug delivery methods, to determine the maximum efficacy of  
79 the TPT modality.

## 81 **Materials and methods**

### 82 **Synthesis of TPT conjugate (cetuximab-IR700DX)**

83 The infrared dye, IRDye<sup>®</sup>700DX NHS ester was purchased from LI-COR Biosciences (Lincoln NE,  
84 USA). Cetuximab, a chimeric mouse/human mAb directed against EGFR was purchased from  
85 Myoderm (Norristown, PA, USA) as the Erbitux<sup>®</sup> (ImClone, LLC/Lilly/BMS) commercial product (Bristol-  
86 Meyers Squibb Co, Princeton, NJ, USA).

87  
88 Erbitux (Cetuximab, 1 mg, 6.8 nmol) was incubated with the water-soluble silicon-phthalocyanine  
89 derivative IR Dye 700DX NHS ester (Li-COR, Lincoln, NE), or IR700 (66.8 µg, 34.2 nmol, 5 mmol/L in  
90 DMSO), in 0.1 mol/L Na<sub>2</sub>HPO<sub>4</sub> (pH 8.5) at room temperature for 1 hour. After the incubation period, the  
91 mixture was buffer-exchanged and purified with phosphate-buffered saline (PBS, pH = 7.1) using  
92 Amicon Ultra-15 Centrifugal Filter Units (EMD Millipore Corporation, Billerica, MA). The final product  
93 purity, average drug to antibody ratio (DAR) and exact protein concentration were determined by size  
94 exclusion high pressure liquid chromatography (SE-HPLC) using the Agilent 1100 HPLC system  
95 equipped with a DAD detector monitoring at 280 and 690nm, fitted with a Shodex Protein KW-803, 8 x  
96 300 mm (Phenomenex, cat. # KW-803) column. The SE-HPLC elution buffer was PBS (pH = 7.1)

97 with a flow rate of 1 mL/min. The conjugation reaction resulted in a DAR of 2.8, final protein  
98 concentration of 5.5 mg/ml and product purity of 99.5%.

### 101 **TPT laser system**

102 A red diode laser (model no. MRL-III-690-800, Changchun New Industries Optoelectronics  
103 Technology Co., Ltd., China) of fixed wavelength at  $690\pm 5$  nm and a maximum power output of  
104 800mW, was used to administer superficial light irradiation (Fig 1).

### 106 **Fig 1. Red diode laser for superficial illumination.**

107 Setup of laser system.

109 Interstitial light irradiation was administered through a 1 cm in length and 1.1 mm tip-width cylindrical  
110 diffuser (maximum output power of 1600 mW), attached at the end of an optical fiber, connected to  
111 the laser source of a clinical laser (model no. ML7710-69--ASP, Modulight, Inc., Finland) of fixed  
112 wavelength at  $690\pm 5$  nm (Fig 2).

### 114 **Fig 2. Clinical laser system for interstitial illumination.**

115 (A) Setup of laser system. (B) setup of cylindrical diffuser used for interstitial illumination.

### 117 **Cell line**

118 Stable green fluorescent protein (GFP) expressing BxPC-3 cells (BxPC3-GFP) from Anticancer, Inc.,  
119 were developed using previously established transfection method [31]. BxPC3 cells were used for the  
120 in-vivo study because are compatible with Cetuximab (an Epidermal Growth Factor Receptor (EGFR)  
121 inhibitor) based treatment. BxPC3 cells express EGFR and have wild type KRAS. Cells were grown in

122 T-75 tissue culture flasks with RPMI 1640 culture media (Gibco-BRL, Grand Island, NY, USA)  
123 supplemented with 10% fetal bovine serum and 1% penicillin/streptomycin (Hyclone, Logan, UT, USA),  
124 and maintained in a humidified incubator at 37 °C, 95% air and 5% carbon dioxide.

### 126 **Animal model: bilateral BxPC-3 – GFP mouse flank model**

127 The subcutaneous xenograft model was established by injecting 10 million BXPC-3 – GFP cells  
128 subcutaneously in the left and right flanks of male athymic (nu/nu) BALB/c mice (Anticancer, Inc., San  
129 Diego, CA) [32]. Animals were selected for treatment when the longest dimension of the subcutaneous  
130 tumors was between 7 to 10 mm in length. The size of the tumors was measured on the day of treatment  
131 using a caliper.

### 133 ***In vivo* TPT experiment design**

134 To evaluate the efficacy of Cet-IR700DX based NIR TPT via interstitial and superficial irradiation, mice  
135 with bilateral subcutaneous tumors were first separated into low and high TPT dosimetry groups herein  
136 referred to as treatment groups, with sample size starting at n = 5 per group. Each mouse was injected  
137 with 100 µg of Cet-IR700DX in PBS intravenously (IV) 24 hours prior to light irradiation. The day of IV  
138 injection was considered t=0h. At 24 hours after IV injection (t= 24h), the right flank tumor of each  
139 mouse was exposed prior to treatment through an incision on the skin. For interstitial irradiation, the  
140 right flank tumors of mice in the low and high dosimetry groups were then irradiated interstitially at 100  
141 J/cm and 300 J/cm doses respectively with a 690nm wavelength light source at 400 mW/cm fixed laser  
142 power output. For superficial irradiation, the right flank tumors of mice in the low and high dosimetry  
143 groups were then irradiated superficially at 50 J/cm<sup>2</sup> and 250 J/cm<sup>2</sup> fluences respectively with a 690nm  
144 wavelength light source at 150 mW/cm<sup>2</sup> fixed laser power output.

146 Immediately after irradiation, the skin incision was sutured to cover the tumor prior to fluorescence  
147 imaging.

148

149 The fluorescence imaging and fluorescence intensity data of GFP were captured before IV to  
150 establish the baseline (at t=0h), after IV and prior to TPT (at t=24 h) to detect and confirm drug  
151 localization in tumors, immediately after TPT, and at termination (t=72 h), 3 days after TPT; for a total  
152 of four imaging time points. The mice were sacrificed at termination (t = 72 h), after their tumors were  
153 excised post imaging, and harvested for further analysis and histological processing.

154

### 155 **Animal care**

156 All animal studies were conducted in compliance with guidelines outlined in the NIH Guide for the  
157 Care and Use of Animals under assurance number A3873-01. The method of euthanasia was  
158 consistent with the recommendations of the American Veterinary Medical Association (AVMA)  
159 Guidelines for the Euthanasia of Animals. The University of California San Diego animal care  
160 program has dedicated vivarium staff and veterinarians that frequently monitor the health and  
161 behavior of the animals housed in the vivarium. All research staff completed the required animal care,  
162 handling, and surgery training prior to conducting the experiments.

163

164 A total of 30 male, 6 week old, athymic (nu/nu) BALB/c mice (Anticancer, Inc., San Diego, CA) were  
165 used in this project. They were maintained in a barrier facility on high efficiency particulate air-filtered  
166 racks. In general, mice were anesthetized during all experimental procedures causing more than  
167 slight pain or distress. A toe pinch was used to ensure adequate anesthesia prior to execution of  
168 surgical, irradiation, and imaging procedures. Anesthesia depth was monitored by measuring  
169 respiratory rate, heart rate, tail pinch, corneal and pedal reflexes, blood pressure, and body  
170 temperature. Anesthesia was achieved by (1) Isoflurane inhalation for procedures of very short

171 duration, i.e. 5-20 minutes, or by (2) an intramuscular injection into the muscle of the hind limb of a  
172 mixture of 50% ketamine, 38% xylazine and 12% acepromazine maleate for the longer term surgical  
173 and imaging procedures (25-40 minutes). Whenever the pain was prolonged and could not be  
174 avoided, the animal was euthanized as soon as possible.

175  
176 To facilitate the execution of procedures and to minimize injury, anesthetized mice were constrained  
177 with soft limb restraints during subcutaneous injection, irradiation, and imaging procedures. During  
178 the tail vein injection procedure of Cet-IR700DX conjugate, non-anesthetized mice were restrained  
179 with AIMS™ Humane Mouse Restrainer. The animals were carefully observed post procedures until  
180 they are fully awake and active. All animals were observed frequently during experiments, and daily  
181 during the 72-hours post irradiation observational period for signs of pain or infection. Signs of  
182 distress were reported to the vivarium animal health staff and staff veterinarian for recommended  
183 treatment or euthanasia. No mortality occurred outside of planned euthanasia or humane endpoints.

184  
185 At the completion of the observational period (at termination, t=72h), all 30 mice were euthanized  
186 while still under anesthesia (after last imaging and tumors excision) in a dedicated vivarium CO<sub>2</sub>  
187 euthanasia chamber, supplied by compressed gas cylinders. Gas flow was maintained for 2 minutes  
188 after apparent clinical death; and death was verified before removing animals from the chamber.

### 189 ***In vivo* fluorescence imaging**

190  
191 The whole animal fluorescence imaging and fluorescence intensity data of GFP were captured using  
192 the MAESTRO CRI In-vivo imaging system (Cri, Woburn, MA, USA) and software (version 2.10.0).

193  
194 The GFP fluorescence signal was detected using the Maestro pre-set blue filter set with a 455-nm  
195 excitation filter (435 to 480 nm range), and a 490 nm long-pass emission filter in 10 nm step imaging



196 increments from 500 to 800 nm, at 350 ms fixed exposure time, and a pixel binning of 1x1. The resulting  
197 image containing the collective spectral fluorescence data from each wavelength within the 500 to 800  
198 nm range was then unmixed using the Maestro software, to isolate the GFP emission wavelength  
199 containing the fluorescence intensity data of interest.

201 The 700DX dye fluorescence signal was detected using the Maestro pre-set red filter set with a 635-  
202 nm excitation filter (616 to 661 nm range), and a 675 nm long-pass emission filter in 10 nm step  
203 imaging increments from 670 to 900 nm, at 700 ms fixed exposure time, and a pixel binning of 1x1.  
204 Using the same method for above for GFP, the fluorescence intensity data for IR700DX was collected  
205 from the channel corresponding to the IR700DX emission wavelength of 700 nm.

### 207 ***In vivo* fluorescence data acquisition**

208 GFP intensity data were extracted from the resulting images using the regions of interest (ROI) method.  
209 The Maestro software used pixel counts to depict fluorescence intensity.

211 The *in vivo* fluorescence data acquired expressed in pixel counts included the total fluorescence  
212 intensity, ROI area, mean intensity, and standard of deviation of the mean. To compare the  
213 fluorescence intensity values across the different time points, the relative fluorescence intensity of GFP  
214 at each time point was calculated by taking the total fluorescence intensity of GFP at t=0h (baseline)  
215 and dividing the total fluorescence intensity of GFP at each time point by the baseline intensity.

### 217 **Statistical analysis**

218 The quantitative data were analyzed using the latest version of OpenStat statistical software by Bill  
219 Miller [33]. As described in the experimental design section, 30 animals were selected randomly and  
220 equally distributed in 5 cages. Each cage was assigned a group based on TPT treatment (superficial

221 and interstitial), and further categorized into a low light dose or high light dose group. One cage was  
222 designated a control group, which received no treatment. Each cage was the experimental unit of  
223 sample size  $n=6$ , and each animal was a biological replicate or observational unit [34]. These numbers  
224 are estimates based on statistical analyses of preliminary data and previously published work of other  
225 investigators using mice models in photo therapy studies. For alpha of 0.05 and power of 0.8, the  
226 minimum required sample size per group (control and experimental) is 5. Twenty percent of additional  
227 animals was included in the total number to account for potential loss of animals during the experimental  
228 period.

229  
230 Each animal in the experimental groups yielded two sets of results, for the control (untreated left flank  
231 tumor), and the treatment (treated right flank tumor), at four time points (before IV, before TPT, after  
232 TPT and 72 hours after TPT).

233  
234 After testing the normality of the data using the Shapiro-Wills and Lilliefors tests, the One-Factor  
235 Analysis of Variance (ANOVA) with Repeated Measures test followed by the post-hoc Tukey Kramer's  
236 test, was used to analyze the difference in mean GFP fluorescence intensities among the four time  
237 points (repeated measure) in each dose group (factor). The Kruskal-Wallis H One Way ANOVA test  
238 followed by the post-hoc Mann-Whitey U test was used to analyze the difference in mean GFP  
239 fluorescence intensities between each dose group (control, low dose, and high dose) at individual time  
240 points [34,35]. Statistical results with  $p<0.05$  were considered statistically significant.

241  
242 The GFP fluorescence intensity measurements of the left control and right treated tumors of each  
243 treatment group were averaged, and the mean intensities were plotted as relative intensity  $\pm$  standard  
244 deviation of the mean intensity.

## 246 **Histological and immunohistochemical analysis**

247 After the mice were sacrificed at t=72h, the subcutaneous tumors were excised and fixed in formalin  
248 for 24 hours. After formalin fixation, the tumors were dehydrated, paraffin-embedded, and cut in 5  $\mu$ m  
249 sections that were then placed on glass slides for GFP immunohistochemical staining and standard  
250 Hematoxylin and Eosin (H&E) histological staining.

251  
252 H&E histological staining was performed to demonstrate necrosis and morphology of damaged  
253 tissue compared to undamaged tissue. The Hematoxylin dye stained the nucleus of the cells blue,  
254 and the Eosin dye stained other cellular and tissue structures pink, orange, and red.

255  
256 GFP immunohistochemical staining was performed to demonstrate treatment efficacy and tumor  
257 viability. To assess the presence of GFP in cells, tissue sections were stained using a polymer based  
258 peroxidase system (ImmPRESS HRP Anti-Goat Ig (Peroxidase) Polymer Detection Kit, Vectorlabs Inc.,  
259 Burlingame, CA). Tissue sections were incubated with a Goat - anti GFP polyclonal primary antibody  
260 (Novus Biologicals, LLC, Littleton CO) at 1:1000 dilution overnight in 4  $^{\circ}$ C, followed by incubation in  
261 ImmPRESS Anti-Goat Peroxidase Polymer reagent for 30 minutes to select for GFP containing cells.  
262 Selection was detected with brown peroxidase substrate DAB (3, 3'-diaminobenzidine). The tissue  
263 sections were counterstained with Hematoxylin (blue color) for nuclear selection and Fast Green FCF  
264 (green color) for selection of the remaining tissue structures.

265  
266 Images of the stained sections were acquired using a microscope (Nikon E600 upright fluorescence  
267 microscope) equipped with a digital camera (Spot QE color camera) from the UCSD Cancer Center  
268 Microscopy Shared Facility Core.

## 270 **Results**

271 Prior to TPT treatment, baseline was established by untreated (conjugate and irradiation naïve) healthy  
272 animals weighing on average 20 grams, and whose subcutaneous tumors have reached 7-10 mm in  
273 length. The six animals originally allocated per group prior to treatment were included in the qualitative  
274 and quantitative data analysis reported herein.

275

276

### 277 **Qualitative analysis of real-time *in vivo* GFP fluorescence intensity**

278 After superficial TPT treatment at 50 J/cm<sup>2</sup> and 250 J/cm<sup>2</sup> light doses on the right flank tumors, loss of  
279 GFP fluorescence was visible compared to the control left flank tumors. Seventy-two hours after  
280 treatment, very little GFP signal was observed on the right flank tumor of the animal treated with 50  
281 J/cm<sup>2</sup>. However, visible GFP fluorescence signal returned on the right flank tumor of the animal  
282 treated at 250 J/cm<sup>2</sup> (Fig 3).

283

### 284 **Fig 3. Whole animal imaging of GFP (green) and Cet-IR700 (red) fluorescence at four time** 285 **points.**

286 1) before intravenous (IV) injection of Cet-IR700DX conjugate at t = 0h; 2) after IV injection and prior  
287 to photo therapy (PT) at t = 24h; 3) immediately after PT, 4) at termination, 3 days or 72 hours after  
288 PT, t = 72h.

289

290 After interstitial TPT treatment, there was visible reduction of GFP fluorescence on the right flank tumors  
291 of both treatment groups, with less visible fluorescence intensity observed in the tumor of the 300 J/cm<sup>2</sup>  
292 treatment group compared to the 100 J/cm<sup>2</sup> treatment group (Fig 4). Seventy-two hours after treatment,  
293 an increase in GFP fluorescence signal was visible on the right flank tumor of both treatment groups;  
294 although is noticeably less than the GFP fluorescence signal at baseline and before TPT.

295

296 **Fig 4. Whole animal imaging of GFP (green) and Cet-IR700 (red) fluorescence at four time**  
297 **points.**

298 1) before intravenous (IV) injection of Cet-IR700 conjugate  $t = 0h$ ; 2) after IV injection and prior to  
299 photo therapy (PT)  $t = 24h$ ; 3) immediately after PT; 4) at termination, 3 days or 72 hours after PT,  $t =$   
300 72h.

301  
302 Prior to intravenous injection (IV) of Cet-IR700DX conjugate, the red fluorescence signal of the dye  
303 was not observed (Figs 3 and 4). After IV however, both left and right flank tumors showed red  
304 fluorescence of Cet-IR700DX indicating the specific binding of the conjugate to cancer cells.

305 Complete loss of Cet-IR700DX red fluorescence was observed immediately after TPT treatment of  
306 the right tumor compared to the left untreated tumor. As expected, some fluorescence signal of Cet-  
307 IR700DX conjugate returned 72 hours post treatment due to residual compound remaining in the  
308 mouse's system.

309  
310 **Quantitative analysis of GFP fluorescence intensity in subcutaneous tumors before and after**  
311 **TPT**

312 The average relative GFP fluorescence intensity measurements of left and right flank tumors of mice  
313 treated with TPT superficially at  $50 \text{ J/cm}^2$  (Fig 5A) and  $250 \text{ J/cm}^2$  (Fig 5B) fluences are presented in  
314 the following graphs. Compared to the left untreated tumor (grey bars), the relative GFP fluorescence  
315 intensity decreased significantly immediately after TPT on both treatment groups (yellow bars) ( $50$   
316  $\text{J/cm}^2$ :  $t(0.0270) < 0.05$  and  $250 \text{ J/cm}^2$ :  $t(0.0420) < 0.05$ , post-hoc Welch t-test).

317  
318 **Fig 5. Mean relative fluorescence intensity measurements.**

319 Mean relative fluorescence intensity of GFP in the control (shown in gray) and treated (shown in  
320 yellow) tumors of mice in  $50 \text{ J/cm}^2$  (A) and  $250 \text{ J/cm}^2$  (B) treatment groups at four time points: 1)

321 before intravenous (IV) injection of Cet-IR700DX conjugate t = 0h, 2) after IV injection and prior to  
322 photo therapy (PT) t = 24 hours, 3) immediately after PT, 4) at termination, 72 hours after PT, t = 72  
323 hours.

324

325 In addition, statistical analysis via the One-Factor ANOVA with repeated measures test showed that  
326 there was a significant difference in GFP fluorescence intensity levels among the four time points in  
327 both treatment groups (50J/cm<sup>2</sup>: F(0.0001)<0.05; 250J/cm<sup>2</sup>: F(0.022)<0.05).

328

329 The GFP fluorescence intensity had significantly decreased by 81% in the 50 J/cm<sup>2</sup> treatment group  
330 (p(0.0001)<0.05, post-hocTukey-Kramer test) and by 91%% in the 250 J/cm<sup>2</sup> treatment group  
331 (p(0.0176)<0.05, Tukey-Kramer test) immediately after TPT, compared to the GFP fluorescence  
332 intensity levels of each group prior to TPT. While 44% of GFP fluorescence signal returned in the 250  
333 J/cm<sup>2</sup> treatment group (p(0.1170) > 0.05, Tukey-Kramer test), and 1% in the 50 J/cm<sup>2</sup> treatment  
334 group (p(0.999)>0.05, Tukey-Kramer test) 72 hours post TPT compared to the GFP fluorescence  
335 signals after TPT, the increase was not significant.

336

337 The difference in cytotoxic effects between the two groups immediately after TPT was not significant  
338 (t(0.341) > 0.05, post-hoc Welch t-test) according to a Welch One Way ANOVA test. However, the  
339 difference in recovery levels 72 hours post treatment (72 HRS) between the two groups as indicated  
340 by the increase in the relative GFP fluorescence intensity level (1% for 50J/cm<sup>2</sup> group and 44% for  
341 250 J/cm<sup>2</sup> group), was statistically significant (t(0.001) < 0.05, Welch t-test).

342

343 The variability in the fluorescence intensity values between baseline and before TPT time points  
344 (likely increase due to tumor growth) in both treatment groups was not significant (50J/cm<sup>2</sup>: p(0.2010)  
345 > 0.05 and 250 J/cm<sup>2</sup>: p(0.1833) > 0.05, Tukey-Kramer test).

346

347 The graphs in Fig 6 show the mean relative GFP fluorescence intensity of left and right flank tumors of  
348 mice treated with TPT interstitially at 100 J/cm (Fig 6A) and 300 J/cm (Fig 6B) light doses. Statistical  
349 analysis via the One-Factor ANOVA with repeated measures test showed that there was a significant  
350 difference in GFP fluorescence intensity levels among the four time points in both treatment groups  
351 (100J/cm:  $F(0.0020) < 0.05$ ; 300J/cm:  $F(0.0010) < 0.05$ ). The GFP fluorescence intensity had  
352 significantly decreased by 69% in the 100 J/cm treated group ( $p(0.0123) < 0.05$ , post-hocTukey-Kramer  
353 test) and by 84% in the 300 J/cm treated group ( $p(0.0002) < 0.05$ , Tukey-Kramer test) immediately after  
354 TPT (blue bars), compared to the GFP fluorescence intensity levels of each group prior to TPT. While  
355 11% of GFP fluorescence signal returned at 72 hours post TPT in the 300 J/cm treatment group, this  
356 change was not significant ( $p(0.7532) > 0.05$ , Tukey-Kramer test). There was no return of GFP  
357 fluorescence signal at 72 hours post TPT in the 100 J/cm treatment group.

358

### 359 **Fig 6. Mean relative fluorescence intensity Measurements.**

360 Mean relative fluorescence intensity of GFP in the control (shown in gray) and treated (shown in blue)  
361 tumors of mice in 100 J/cm (A) and 300 J/cm (B) treatment groups at four time points: 1) before  
362 intravenous (IV) injection of Cet-IR700DX conjugate  $t = 0h$ , 2) after IV injection and prior to PT  $t = 24$   
363 hours, 3) immediately after PT, 4) at termination, 72 hours after PT,  $t = 72$  hours.

364

365 A Kruskal-Wallis One Way ANOVA H test followed by Mann-Whitney U test showed that there was no  
366 difference in therapeutic efficacy between the 100J/cm and 300J/cm group immediately after TPT  
367 ( $U=9.0$ ,  $z(0.1444) > 0.05$ ) and at 72 hours after TPT( $U=6.0$ ,  $z(0.5000) > 0.05$ ).

368

369 The slight variability in the fluorescence intensity values between baseline and before TPT time points  
370 in both treatment groups was not significant (100J/cm:  $p(0.3530) > 0.05$  and 300 J/cm:  $p(0.9960) >$   
371 0.05, Tukey-Kramer test).

372

373 No adverse events were observed in each experimental group during or after TPT treatment.

374

### 375 **Immunohistological analysis of tumor tissue samples**

376 Standard H&E staining was used to evaluate the morphology of tissue after TPT compared to control  
377 and to demonstrate necrosis resulting from treatment. Therapeutic efficacy and tumor viability was  
378 evaluated using GFP immunohistochemical staining.

379

380 Overall damage to tumor cells and the extracellular matrix were observed in this study after TPT (right  
381 tumors) compared to control (left tumors). The histological sections of treated tumors showed  
382 extracellular matrix (ECM) fragmentation and detachment, vacuolation of the ECM, loss of cytoplasmic  
383 membrane and loss of cell roundness compared to control; which are morphological characteristics of  
384 photo-damaged tissues [36-40].

385

386 There was more significant damage observed in tumors treated at the 50J/cm<sup>2</sup> light dose (Fig 7, right)  
387 compared to those treated at the 250 J/cm<sup>2</sup> dose (Fig 8, right). The H&E stained histological tissue  
388 sample of a treated tumor depicted in Fig 8 (right image) for the 250 J/cm<sup>2</sup> treatment group, shows the  
389 presence of viable cells, while the tissue sample of the 50 J/cm<sup>2</sup> treatment group (Fig 7) shows mostly  
390 damaged cells (elongated nuclei fragments and loss of cytoplasmic membrane), and detached ECM  
391 compared to control.

392

393



394 **Fig 7. Histological staining of representative tissue sample in the 50 J/cm<sup>2</sup> treatment group.**

395 Routine hematoxylin and Eosin (H&E) histological staining was performed on tissue sections  
396 (Purple). Color code: **Pink** -Tissue Structures (ECM, Erythrocytes, Blood Vessels, Muscle Fibers,  
397 Skin, Fat, Collagen), **Dark Blue/Purple** – Nucleus.

398

399 **Fig 8. Histological staining of a representative tissue sample in the 250 J/cm<sup>2</sup> treatment**  
400 **group.**

401 Routine hematoxylin and Eosin (H&E) histological staining was performed on tissue sections  
402 (Purple). Color code - **Pink** -Tissue Structures (ECM, Erythrocytes, Blood Vessels, Muscle Fibers,  
403 Skin, Fat, Collagen), **Dark Blue/Purple** – Nucleus.

404

405 In tumor samples irradiated interstitially (Figs 9 and 10), there was more significant damage observed  
406 in tumors treated at the high 300J/cm light dose (Fig 10) compared to those treated at the low 100 J/cm  
407 dose (Fig 9).

408

409 **Fig 9. Immunohistochemical staining of representative tumor tissue sample in the 100 J/cm**  
410 **treatment group.**

411 The GFP protein in viable BxPC-3 cells was detected with anti-GFP antibody along with horseradish  
412 peroxidase DAB **brown** staining; tissue was counterstained with Fast Green FCF (**green**), and nuclear  
413 Hematoxylin (**blue**).

414

415 **Fig 10. Immunohistochemical staining of representative tumor tissue sample in the 300 J/cm**  
416 **treatment group.**

417 The GFP protein in viable BxPC-3 cells was detected with anti-GFP antibody along with horseradish  
418 peroxidase DAB brown staining; tissue was counterstained with Fast Green FCF (green), and nuclear  
419 Hematoxylin (blue).

420  
421 In treated tumors of the 100 J/cm group (Fig 9), while there was some damage to the tumor tissue and  
422 some loss of GFP stain, there was retention of viable cells throughout the tumor tissue compared to  
423 control tissue samples, as evidenced by presence of round cells clusters and brown GFP stain. TPT in  
424 the right flank tumors of the 300 J/cm group (Fig 10) resulted in loss of GFP brown stain compared to  
425 control tissue samples.

#### 426 427 **Histological analysis of normal tissue after TPT**

428 The morphology of blood vessels, muscle tissue and adipose tissue after TPT (Fig 11, treated) was  
429 comparable to the morphology of these tissue components in control samples (Fig 11, untreated). No  
430 damage to these tissue structures was observed after irradiation.

#### 431 432 **Fig 11. Histological staining of representative control and treated tissue samples in the 300** 433 **J/cm dose group.**

434 Routine hematoxylin and Eosin (H&E) histological staining was performed on tissue sections. Legend:  
435 ECM – Extracellular Matrix; TU – tumor; Mu – Muscle; AD – Adipose Tissue; HB – Hair bulb; BD/BV –  
436 Blood/Blood vessel.

## 442 Discussion

443 The effectiveness of targeted photo therapy administered superficially has been demonstrated to  
444 selectively induce some cytotoxicity in different types of cancers *in vitro* and *in vivo* immediately after  
445 treatment, and more complete cytotoxicity in the long-term after repeated irradiations [11-23].

446  
447 In the present study, we investigated the effectiveness of both superficial and interstitial administration  
448 of Cetuximab-IR700DX based near-infrared targeted photo therapy (NIR-TPT) in pancreatic cancer *in*  
449 *vivo*, to compare the therapeutic efficacy of TPT under different light delivery mechanisms.

450  
451 GFP was used to assess treatment results of Cet-IR700DX based NIR-TPT qualitatively (Figs 3 and  
452 4), quantitatively (Figs 5 and 6) and histochemically (Figs 9 and 10), demonstrating its multi-utility in a  
453 single study, and its effectiveness as a marker of therapeutic efficacy. As communicated earlier, the  
454 degree of cytotoxicity was determined by the decrease in GFP fluorescence intensity levels.  
455 Establishing the initial conditions as 100% intensity level to indicate complete cell viability, and 0%  
456 intensity level to indicate complete cell death in a tumor sample, the lower the GFP intensity level, the  
457 higher the degree of cytotoxicity elicited by the treatment.

458  
459 Analogous to other TPT studies, acute cytotoxicity was achieved immediately after treatment under  
460 both light delivery strategies; GFP fluorescence intensity decreased immediately after TPT by 81%  
461 ( $p<0.05$ ) and by 91% ( $p<0.05$ ) in tumors treated superficially at 50 J/cm<sup>2</sup> and 250 J/cm<sup>2</sup> respectively  
462 compared to controls (Fig 3), and by 69% ( $p<0.05$ ) and 84% ( $p<0.05$ ) in tumors treated interstitially at  
463 100 J/cm and 300 J/cm respectively compared to controls (Fig 4). Preliminarily, these data indicate  
464 that superficial TPT was more effective in eliciting acute cytotoxicity as indicated by higher signal loss  
465 percentages, compared to interstitial TPT. However, 72 hours post treatment, GFP fluorescence  
466 signal recovery was observed in both light dose of the superficial TPT treatment groups, and in the

467 higher dose of the interstitial TPT treatment group. These results support the data of other TPT  
468 studies that demonstrated that a single TPT treatment did not inhibit cancer recurrence, and that  
469 repeated treatments were necessary to kill almost all cancer cells in the long-term [41-43].

470  
471 While the higher light dose resulted in higher GFP signal loss in both light delivery strategies  
472 immediately after treatment, the interstitial TPT strategy resulted in less GFP fluorescence signal  
473 recovery 72 hours post irradiation and thus more complete cytotoxic effect (0% recovery at 100 J/cm,  
474 and 11% recovery at 300 J/cm), compared to superficial TPT (1% and 44% recovery at 50J/cm<sup>2</sup> and  
475 250 J/cm<sup>2</sup> respectively). These signal recovery data were not statistically significant intra groups  
476 ( $p > 0.05$  among low and high doses), but were statistically significant inter groups ( $p < 0.05$  between  
477 interstitial and superficial treatments).

478  
479 These data demonstrated that interstitial TPT was more effective in achieving long-term cytotoxicity  
480 as indicated by lower signal recovery 72 hours post treatment (less viable cells present) compared to  
481 superficial TPT. In addition, these data demonstrated that better long-term cytotoxicity was achieved  
482 at lower light doses in both light delivery strategies (0% and 1% signal recovery at 100 J/cm  
483 interstitially and 50 J/cm<sup>2</sup> superficially, respectively).

484  
485 These quantitative results were further supported by histological results, which showed significant  
486 tissue damage in treated samples compared controls (Figs 7 to 10), as indicated by fragmented ECM  
487 and loss of viable round cell clusters in treated samples compared to controls. Furthermore, in  
488 histological samples of tumors treated interstitially, reduced amount of brown GFP stain in treated  
489 samples compared to controls was indicative to loss of viable cells (Figs 9 and 10). Samples treated  
490 superficially had residual viable cells after low and high light dose treatments, whereas samples treated  
491 interstitially had some residual viable cells at 100 J/cm and no present residual viable cells at 300 J/cm.

492 This demonstrated that interstitial illumination elicited more complete cytotoxicity compared to  
493 superficial illumination.

494  
495 Damage to normal tissue components such as muscle, skin, blood vessels and adipose tissue however  
496 was not observed (Fig 11); demonstrating the selectivity of Cet-IR700DX based NIR-TPT to tumor cells  
497 only. Co-localization of the red fluorescence of the IR700DX dye and green fluorescence of the GFP  
498 protein present in BxPC-3 cells of the mice subcutaneous tumors observed in the *in vivo* imaging data  
499 (Figs 3 and 4) also demonstrated the selectivity of Cet-IR700DX conjugate to tumor cells.

500  
501 While male mice were used in the study to reduce cost and use of animals, it could have presented  
502 bias in the results. A study including both male and female mice will be conducted in the future to  
503 account for sex as a possible source of bias. Furthermore, a study using a more physiologically relevant  
504 animal model, such as an orthotopic pancreatic cancer mouse model, will be conducted to confirm the  
505 results obtained in this study.

## 506 507 **Conclusion**

508 Overall, Cetuximab-IR700DX based near infra-red targeted phototherapy was effective in inducing  
509 selective killing of pancreatic cancer cells *in vivo* in a subcutaneous xenograft mouse model,  
510 especially at the low light dose. Cetuximab-IR700DX based TPT administered interstitially however,  
511 was more effective at inducing long-term selective cell damage, as demonstrated by the lower GFP  
512 fluorescence signal recovery at both dosimetries and more tissue damage present in histological  
513 tissue samples of treated tumors, compared to superficial TPT. Interstitial TPT thus, could be a better  
514 method to achieve more complete cytotoxicity after a single treatment, compared to achieving  
515 complete cytotoxicity after repeated treatments; which can lead to therapy induced resistance in  
516 treated tumors.

517

518 While these results are promising, further studies are needed to determine the optimal light delivery  
519 strategy, TPT conjugate, and light dose combination that will result in maximum cytotoxicity and long-  
520 term prevention of cancer recurrence and metastasis.

521

## 522 **Acknowledgements**

523 The author acknowledges the National Cancer Institute (NIH Diversity Supplement 3R01CA142669-  
524 05S1), the University of California San Diego UCSD Cancer Center Microscopy Shared Facility  
525 program (NIH Support Grant P30 CA23100), Dr. Michael Bouvet, and Aspyrian Therapeutics, Inc., for  
526 supporting this project.

527

## 528 **References**

- 529 1. Dimastromatteo J, Houghton JL., Lewis JS., Kelly KA. Challenges of pancreatic cancer. *Cancer*  
530 *Journal* (Sudbury, Mass.). 2015; 21 (3): 188–93. doi:10.1097/PPO.000000000000109.
- 531 2. Gianmauro N, Longo V, Courthod G, Silvestris N. Cancer survivorship: long-term side-effects of  
532 anticancer treatments of gastrointestinal cancer. *Current Opinion in Oncology* 27. 2015; 4: 351–57.  
533 doi:10.1097/CCO.000000000000203.
- 534 3. Vanja V, Sperduti I, Vari S, Bria E, Melisi D, Garufi C, et. al. Metastatic pancreatic cancer: is there  
535 a light at the end of the tunnel? *World Journal of Gastroenterology: WJG*. 2015; 21(16): 4788–4801.  
536 doi:10.3748/wjg.v21.i16.4788.
- 537 4. American Cancer Society. *Cancer facts & figures*. 2014.
- 538 5. Vivek M, Moser JA. Current management of locally advanced pancreatic cancer. *Nature Clinical*  
539 *Practice. Gastroenterology & Hepatology*. 2005; 2(8): 356–64. doi: 10.1038/ncpgasthep0240.

- 540 6. McGrath, PC, Sloan DA, Kenady DE. Surgical management of pancreatic carcinoma. *Seminars in*  
541 *Oncology*. 1996; 23(2): 200–212.
- 542 7. Nakao, A. Oncological problems in pancreatic cancer surgery. *Nagoya Journal of Medical Science*.  
543 2000; 63(1–2): 1–7.
- 544 8. Rosenberg, L. Pancreatic cancer: a review of emerging therapies. *Drugs*.2000; 59(5): 1071–89.
- 545 9. Schnall, SF, Macdonald JS. Chemotherapy of adenocarcinoma of the pancreas. *Seminars in*  
546 *Oncology*.1996; 23(2): 220–28.
- 547 10. Thomas, PR. Radiotherapy for carcinoma of the pancreas. *Seminars in Oncology*. 1996; 23(2): 213–  
548 19.
- 549 11. Mew, D, Wat CK, Towers GH, Levy J. G. Photoimmunotherapy: treatment of animal tumors with  
550 tumor-specific monoclonal antibody-hematoporphyrin conjugates. *Journal of Immunolog*. 1983;  
551 130(3): 1473–77.
- 552 12. Wat, CK, Mew D, Levy JG, and Towers GH. Photosensitizer-protein conjugates: potential use as  
553 photoimmunotherapeutic agents. *Progress in Clinical and Biological Research*.1984; 170: 351–59.
- 554 13. Goff, BA., Bamberg M, Hasan T. Photoimmunotherapy of human ovarian carcinoma cells ex vivo.  
555 *Cancer Research*. 1991; 51(18): 4762–67.
- 556 14. Pogrebniak HW, Matthews W, Black C, Russo A, Mitchell JB, Smith P, et al. Targeted phototherapy  
557 with sensitizer-monoclonal antibody conjugate and light. *Surgical Oncology*.1993; 2(1): 31–42.
- 558 15. Mitsunaga M, Ogawa M, Kosaka N, Rosenblum LT, Choyke PL, Kobayashi H. Cancer cell-selective  
559 in vivo near infrared photoimmunotherapy targeting specific membrane molecules. *Nat Med*. 2011;  
560 17(12):1685-91. doi: 10.1038/nm.2554.
- 561 16. Mitsunaga M, Nakajima T, Sano K, Kramer-Marek G, Choyke PL, Kobayashi H. Immediate in vivo  
562 target-specific cancer cell death after near infrared photoimmunotherapy. *BMC Cancer*.2012;  
563 12:345. doi: 10.1186/1471-2407-12-345.

- 564 17. Sato K, Choyke PL, Kobayashi H. Photoimmunotherapy of gastric cancer peritoneal carcinomatosis  
565 in a mouse model. 2014; PLoS One. 9(11): e113276. doi: 10.1371/journal.pone.0113276.
- 566 18. Yukihiro H, Maawy A, Zhang Y, Garcia-Guzman M, Heim R, Makings L, et al. Photoimmunotherapy  
567 inhibits tumor recurrence after surgical resection on a pancreatic cancer patient-derived orthotopic  
568 xenograft (pdx) nude mouse model. *Annals of Surgical Oncology*. 2015; 22(3): 1469–1474.  
569 doi:10.1245/s10434-015-4553-9.
- 570 19. Maawy A., Yukihiro H, Zhang Y, Heim R, Makings L, Garcia-Guzman M, et al. Near infra-red  
571 photoimmunotherapy with anti-*cea-ir700* results in extensive tumor lysis and a significant decrease  
572 in tumor burden in orthotopic mouse models of pancreatic cancer. *PloS One*. 2015; 10(3):  
573 e0121989. doi:10.1371/journal.pone.0121989.
- 574 20. Sato K, Hanaoka H, Watanabe R, Nakajima T, Choyke PL, Kobayashi H. Near infrared  
575 photoimmunotherapy in the treatment of disseminated peritoneal ovarian cancer. *Molecular Cancer*  
576 *Therapeutics*. 2015; 14(1): 141–50. doi:10.1158/1535-7163.MCT-14-0658.
- 577 21. Sato K, Nagaya T, Nakamura Y, Harada T, Choyke PL, Kobayashi H. Near infrared  
578 photoimmunotherapy prevents lung cancer metastases in a murine model. *Oncotarget*. 2015;  
579 6:19747-19758. doi: 10.18632/oncotarget.3850.
- 580 22. Shimoyama K, Kagawa S, Ishida M, Watanabe S, Noma K, Takehara K, et al. Viral transduction of  
581 the *her2*-extracellular domain expands trastuzumab-based photoimmunotherapy for *her2*-negative  
582 breast cancer cells. *Breast Cancer Research and Treatment*. 2015;149 (3): 597–605.  
583 doi:10.1007/s10549-015-3265-y.
- 584 23. Watanabe R, Hanaoka H, Sato K, Nagaya T, Harada T, Mitsunaga M, et al. Photoimmunotherapy  
585 targeting prostate-specific membrane antigen: are antibody fragments as effective as antibodies?  
586 *Journal of Nuclear Medicine: Official Publication, Society of Nuclear Medicine*. 2015; 56(1): 140–  
587 44. doi:10.2967/jnumed.114.149526.



- 588 24. Tsien RY. The green fluorescent protein. *Annual Review of Biochemistry*. 1998; 67: 509–44.  
589 doi:10.1146/annurev.biochem.67.1.509.
- 590 25. Chudakov DM., Lukyanov S, Lukyanov KA. Fluorescent proteins as a toolkit for in vivo imaging.  
591 *Trends in Biotechnology*. 2005; 23(12): 605–13. doi:10.1016/j.tibtech.2005.10.005.
- 592 26. Enterina JR, Wu L, Campbell RE. Emerging fluorescent protein technologies. *Current Opinion in*  
593 *Chemical Biology* .2015; 27: 10–17. doi:10.1016/j.cbpa.2015.05.001.
- 594 27. Gerdes HH, Kaether C. Green fluorescent protein: applications in cell biology. *FEBS Letters*. 1996;  
595 389(1): 44–47.
- 596 28. Johnson, W L, Straight AF. Fluorescent protein applications in microscopy. *Methods in Cell Biology*.  
597 2013; 114: 99–123. doi:10.1016/B978-0-12-407761-4.00005-1.
- 598 29. Kain N. Green fluorescent protein (gfp): applications in cell-based assays for drug discovery. *Drug*  
599 *Discovery Today* .1999; 4(7): 304–12.
- 600 30. March JC, Rao G, Bentley WE. Biotechnological applications of green fluorescent protein. *Applied*  
601 *Microbiology and Biotechnology*. 2003; 62 (4): 303–15. doi:10.1007/s00253-003-1339-y.
- 602 31. Hoffman RM. Green fluorescent protein to visualize cancer progression and metastasis. *Methods*  
603 *in Enzymology*, Academic Press. 1999; 302: 20-31. ISBN 9780121822033.
- 604 32. Hoffman RM. Orthotopic transplant mouse models with green fluorescent protein-expressing cancer  
605 cells to visualize metastasis and angiogenesis. *Cancer and Metastasis Reviews*. 1999; 17:271-277.
- 606 33. Miller B. OpenStat statistical software (<http://statpages.info/miller>).
- 607 34. Festing MFW, Altman DG. Guidelines for the design and statistical analysis of experiments using  
608 laboratory animals. *ILAR Journal*. 2002; 43(4): 244–58, doi:10.1093/ilar.43.4.244.
- 609 35. Nayak BK, Hazra A. How to choose the right statistical test? *Indian Journal of Ophthalmology*. 2011;  
610 59 (2): 85–86, doi:10.4103/0301-4738.77005.

- 611 36. Peng CL.; Shih YH, Lee PC, Hsieh MH, Luo TY, Shieh MJ. Multimodal image-guided photothermal  
612 therapy mediated by 188 re-labeled micelles containing a cyanine-type photosensitizer. ACS Nano.  
613 2011; 5 (7): 5594-5607.
- 614 37. De Magalhães N, Liaw LH, Berns MW, Cristini V., Chen Z., Stupack D., et al. Applications of a new  
615 *in vivo* tumor spheroid based shell-Less chorioallantoic membrane 3-D model in bioengineering  
616 research. J Biomed Sci Engineering. 2010; 3 (1):20-26. doi:10.4236/jbise.2010.31003. PMID:  
617 PMC3019609.
- 618 38. Alvarez, A. Cell death. A comprehensive approximation. Necrosis. Microscopy: Science,  
619 Technology, Application, and Education. 2010; 3: 1017-1024.
- 620 39. Van Cruchten S, Van den Broeck W. Morphological and biochemical aspects of apoptosis, oncosis  
621 and necrosis. Anatomia, Histologia, Embryologia. 2002; 31: 214–223. doi: 10.1046/j.1439-  
622 0264.2002.00398.x
- 623 40. Majno G, Joris I. Apoptosis, oncosis, and necrosis. An overview of cell death. The American Journal  
624 of Pathology. 1995; 146 (1):3-15.
- 625 41. Mitsunaga M, Nakajima T, Sano K, Choyke PL, Kobayashi H. Near-infrared theranostic  
626 photoimmunotherapy (PIT): repeated exposure of light enhances the effect of immunoconjugate.  
627 Bioconjug Chem. 2012; 23(3):604-9. doi: 10.1021/bc200648m.
- 628 42. Takahito N, Sano K, Choyke PL, Kobayashi H. Improving the efficacy of photoimmunotherapy (PIT)  
629 using a cocktail of antibody conjugates in a multiple antigen tumor model. Theranostics. 2013; 3(6):  
630 357–65. doi:10.7150/thno.5908.
- 631 43. Sato K, Watanabe R, Hanaoka H, Harada T, Nakajima T, Kim I, et al. Photoimmunotherapy:  
632 comparative effectiveness of two monoclonal antibodies targeting the epidermal growth factor  
633 receptor. Mol Oncol. 2014; 8(3):620-32. doi: 10.1016/j.molonc.2014.01.006.
- 634  
635

636 **Figures**

637 **Figure 1**

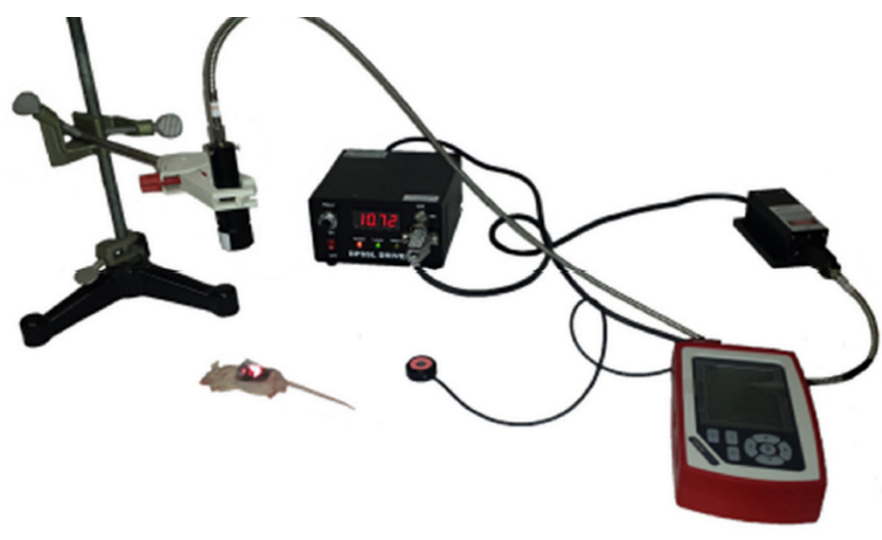

638

639

640 **Figure 2**

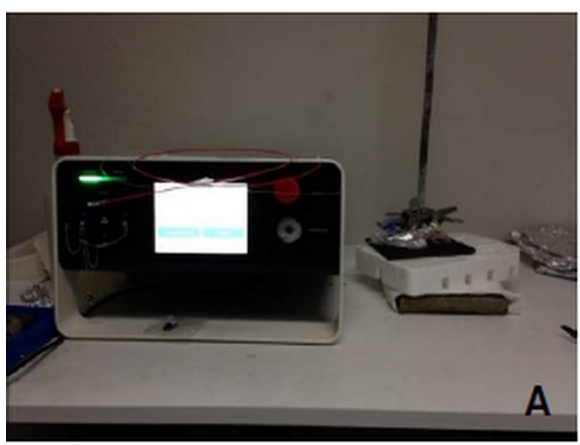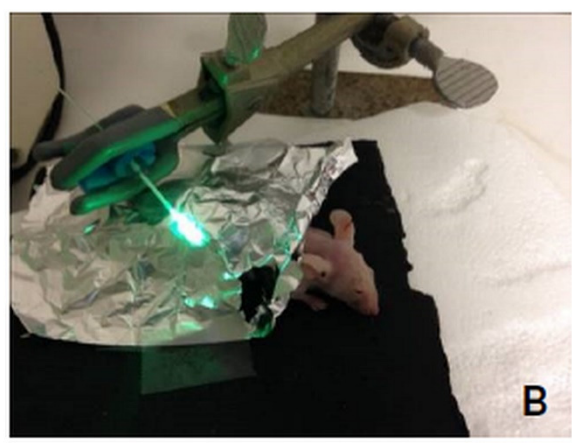

641

642

643

644

645

646

647

648

649

650 **Figure 3**

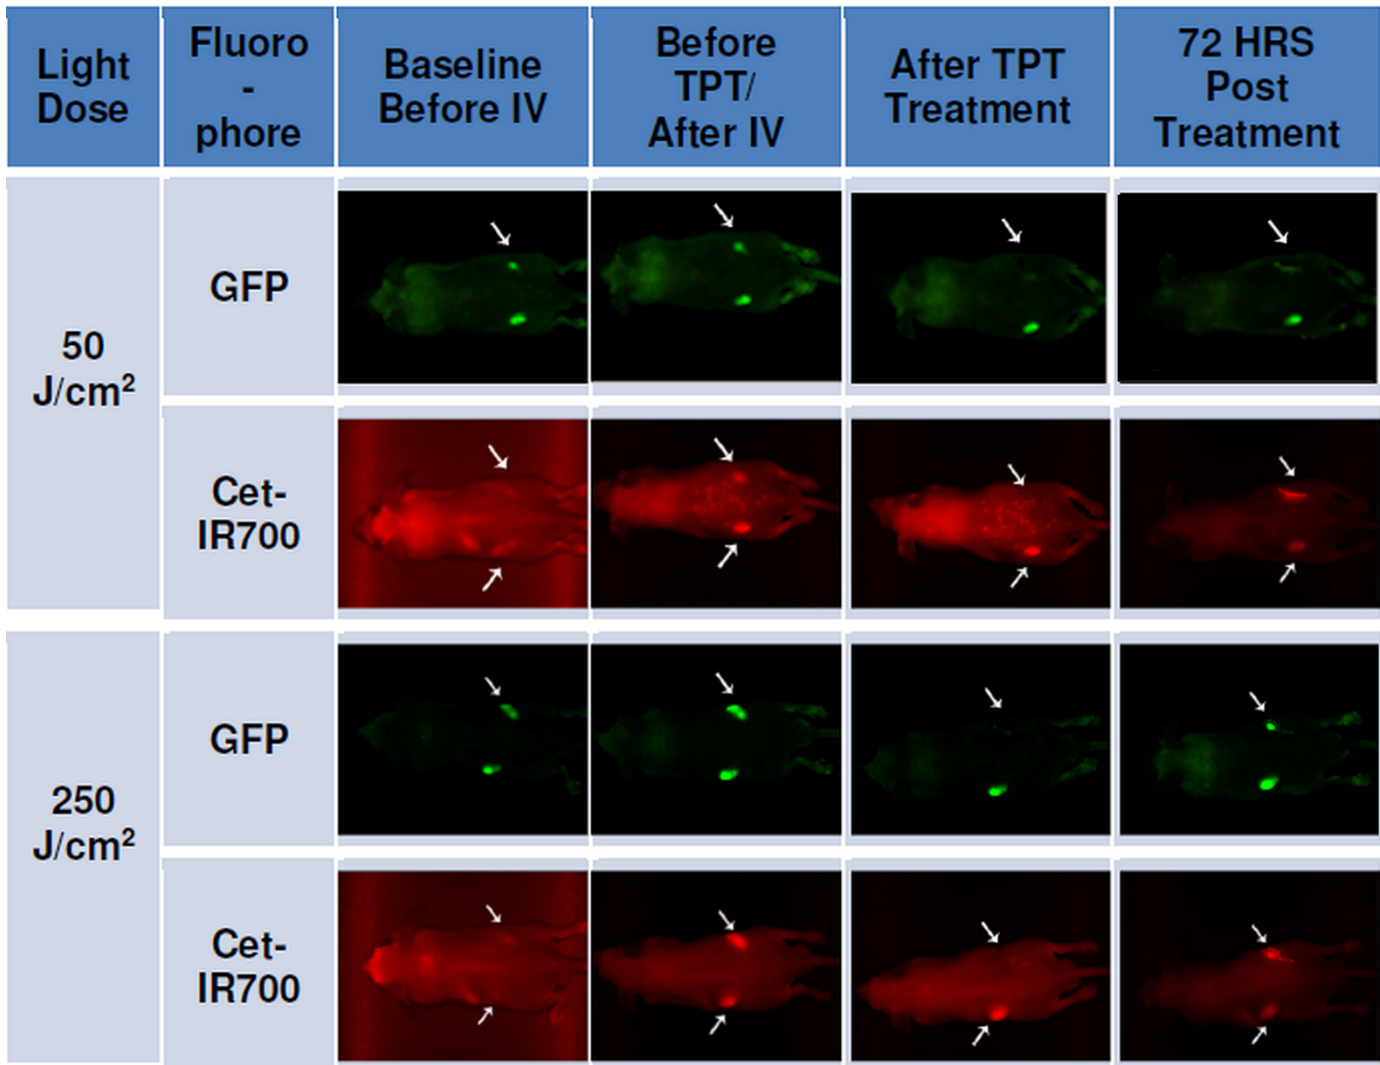

651

652

653

654

655

656

657

658

659

660

661 **Figure 4**

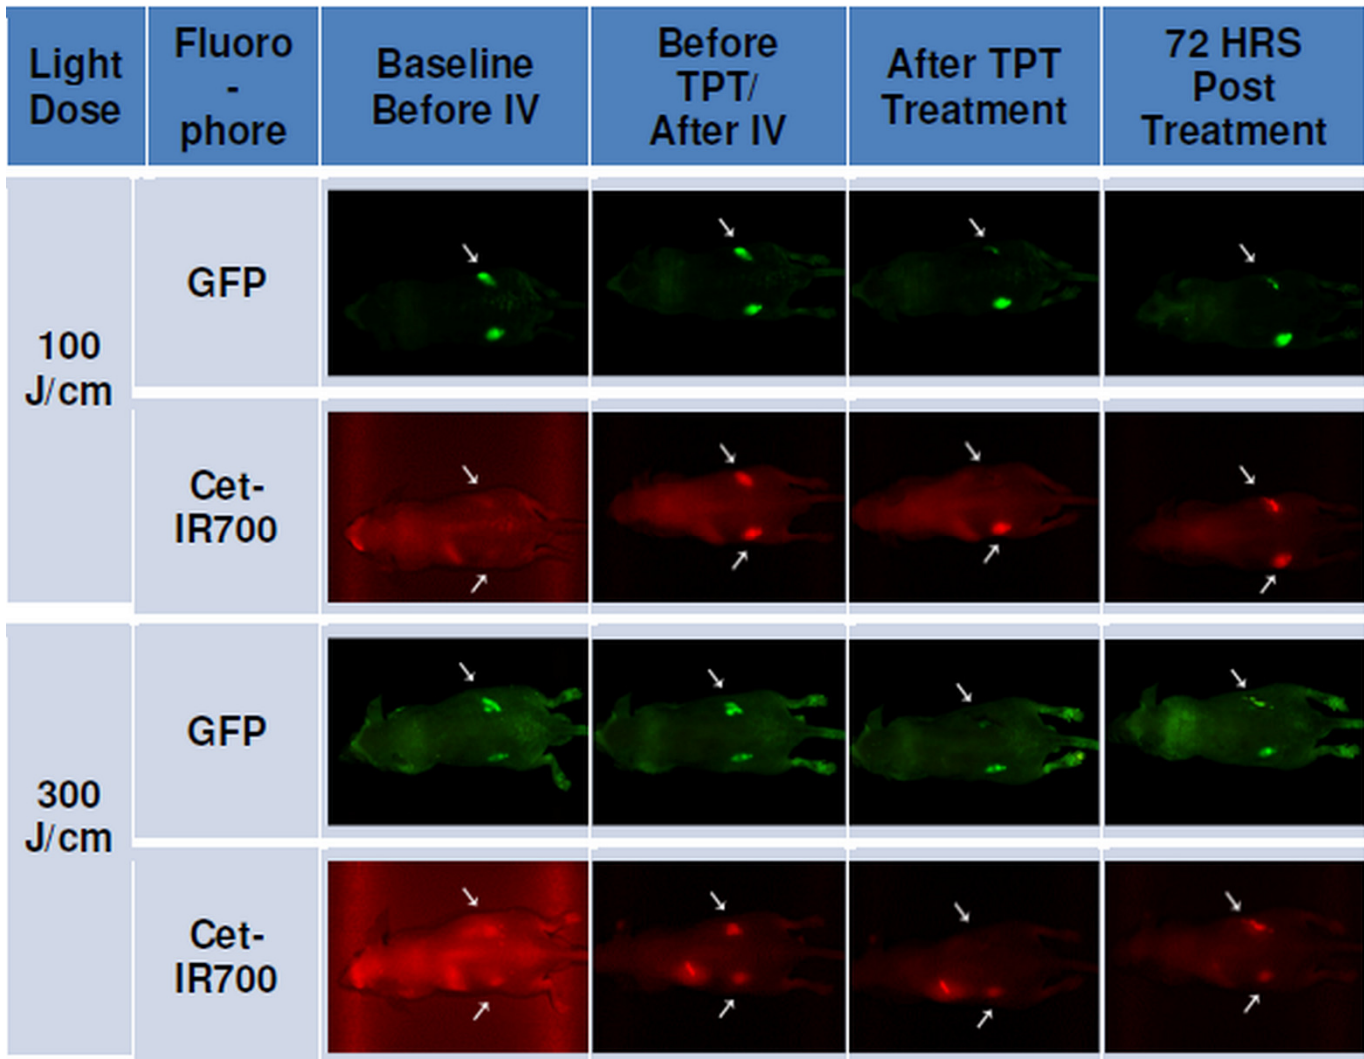

662

663

664

665

666

667

668

669

670

671

672 **Figure 5**

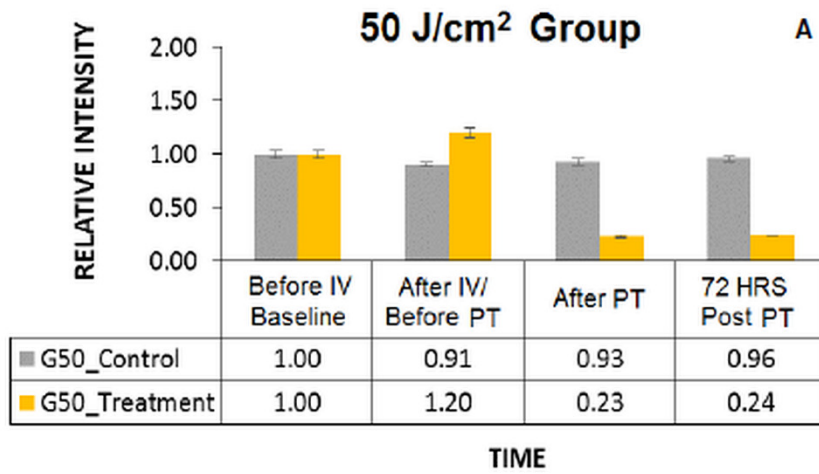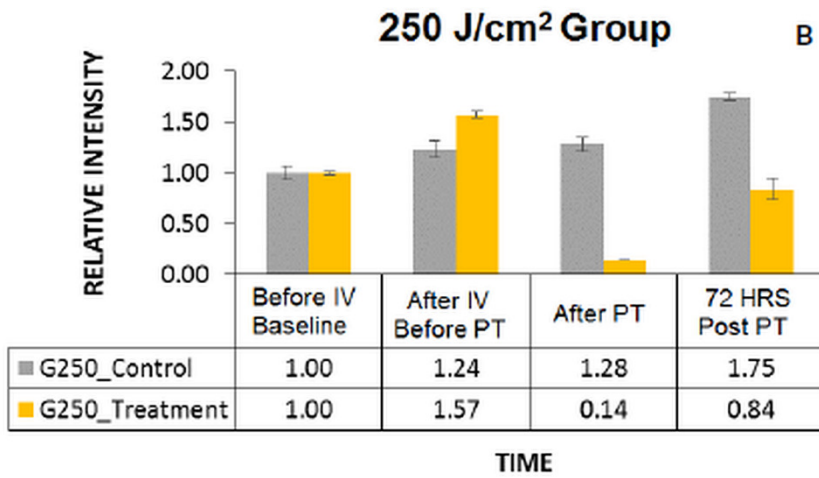

673

674

675

676

677

678

679

680

681

682

683 **Figure 6**

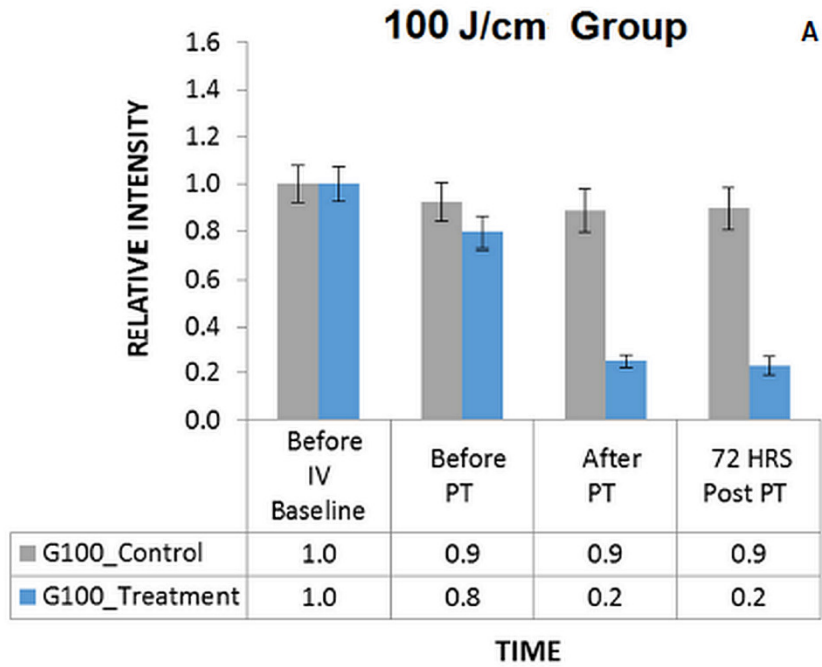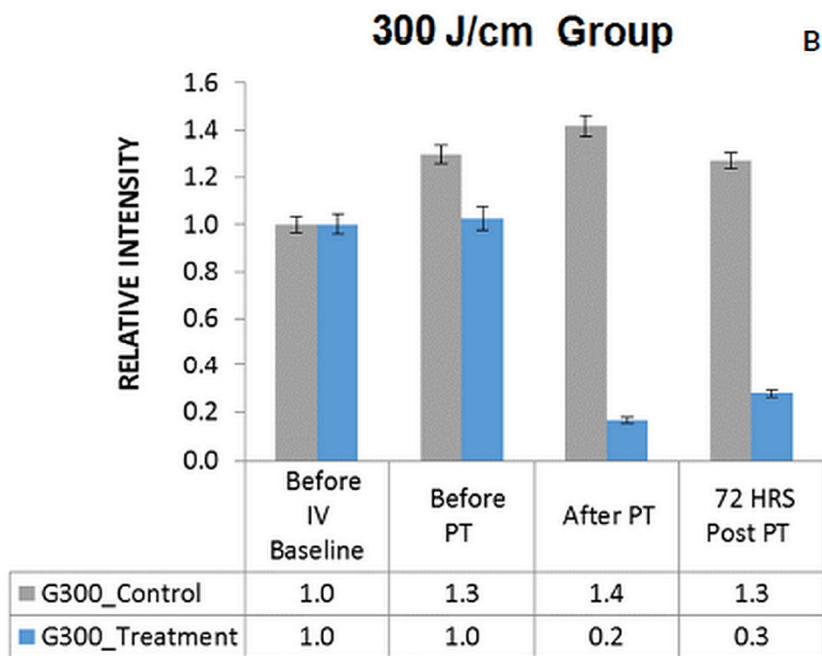

684

685

686

687

688



689

690 **Figure 7**

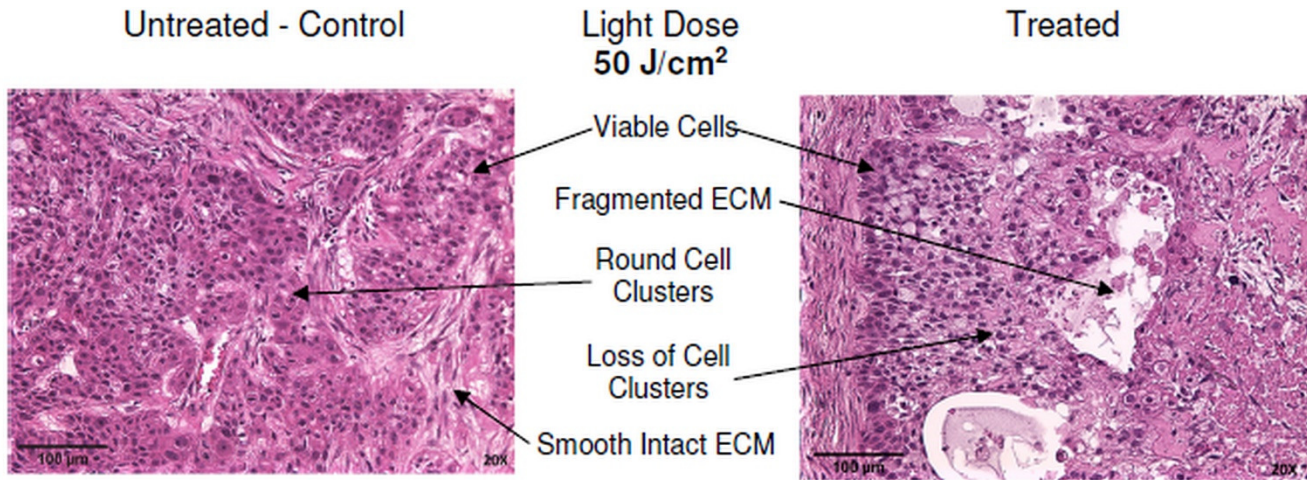

691

692

693 **Figure 8**

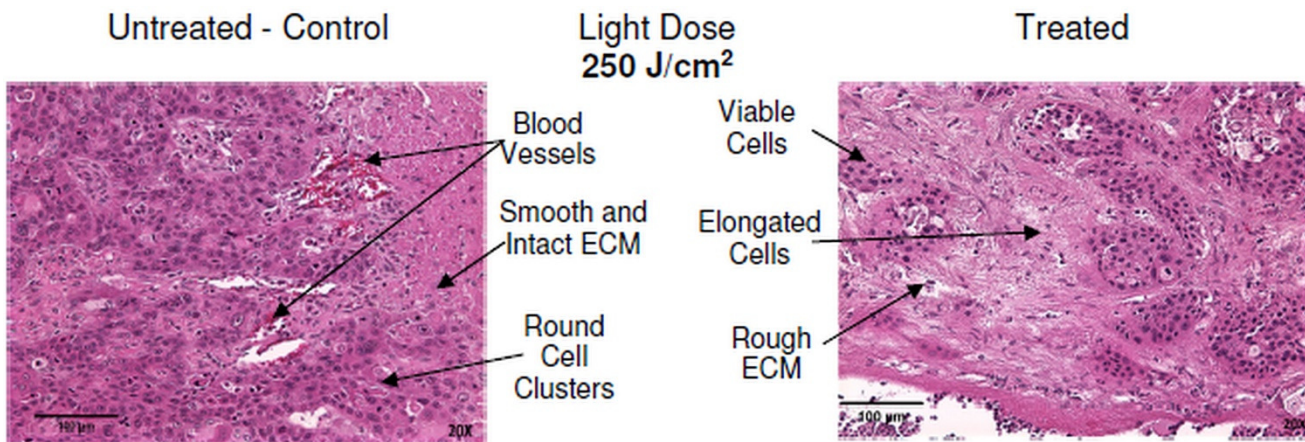

694

695

696

697

698

699

700

701

702



703 **Figure 9**

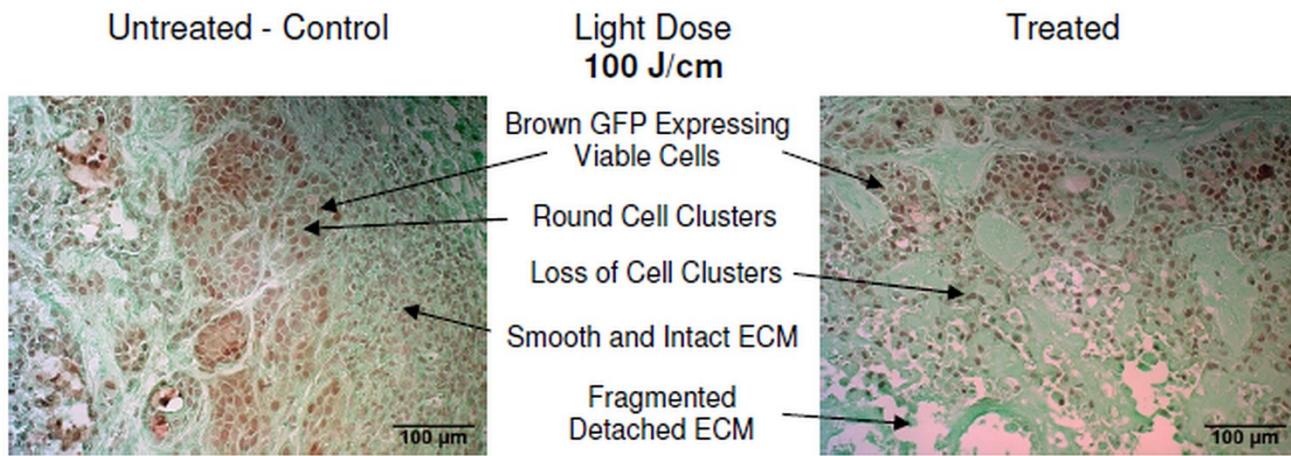

707 **Figure 10**

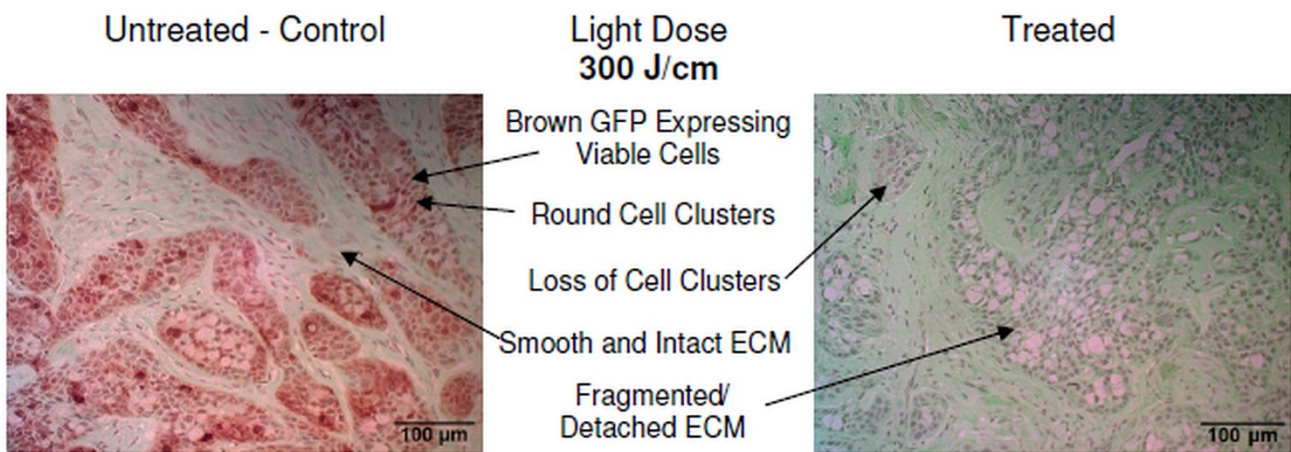

710 **Figure 11**

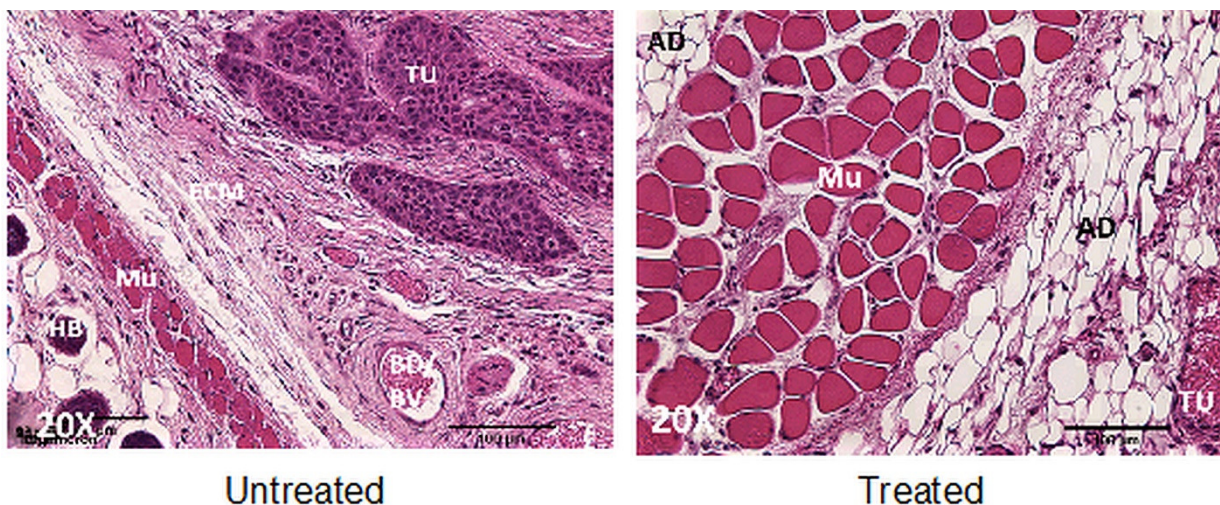

Source: http://biorxiv.org/content/10.1101/408021v1.full.pdf
